# Supplementary material
Source: HighWire-hosted journal article supplement (https://www.cmajopen.ca/highwire/filestream/89019/field_highwire_adjunct_files/2/open-2021-0159-coreq.pdf)
Supplement: open-2021-0159-coreq.pdf [file open-2021-0159-coreq.pdf]

**Table 1**

Consolidated criteria for reporting qualitative studies (COREQ): 32-item checklist

| No                                                     | Item                     | Guide questions/description                                                                                                                                            |
|--------------------------------------------------------|--------------------------|------------------------------------------------------------------------------------------------------------------------------------------------------------------------|
| <b>Domain 1:<br/>Research team<br/>and reflexivity</b> |                          |                                                                                                                                                                        |
| Personal<br>Characteristics                            |                          |                                                                                                                                                                        |
| 1.                                                     | Interviewer/facilitator  | Which author/s conducted the interview or focus group?<br><b>Student researcher, Kyle Irvine<br/>(Page 2)</b>                                                          |
| 2.                                                     | Credentials              | What were the researcher's credentials? <i>E.g. PhD, MD</i><br><b>MD</b>                                                                                               |
| 3.                                                     | Occupation               | What was their occupation at the time of the study?<br><b>Surgical resident</b>                                                                                        |
| 4.                                                     | Gender                   | Was the researcher male or female?<br><b>Male</b>                                                                                                                      |
| 5.                                                     | Experience and training  | What experience or training did the researcher have?<br><b>Previous experience with qualitative research, focus groups and patient interviews. No formal training.</b> |
| Relationship<br>with<br>participants                   |                          |                                                                                                                                                                        |
| 6.                                                     | Relationship established | Was a relationship established prior to study commencement?<br><b>No</b>                                                                                               |

| No                            | Item                                     | Guide questions/description                                                                                                                                                                                                                                                                                                                                                                   |
|-------------------------------|------------------------------------------|-----------------------------------------------------------------------------------------------------------------------------------------------------------------------------------------------------------------------------------------------------------------------------------------------------------------------------------------------------------------------------------------------|
| 7.                            | Participant knowledge of the interviewer | What did the participants know about the researcher? <i>e.g. personal goals, reasons for doing the research</i><br><b>Participants were told the researcher's profession and the aim of the research project.</b>                                                                                                                                                                             |
| 8.                            | Interviewer characteristics              | What characteristics were reported about the interviewer/facilitator? <i>e.g. Bias, assumptions, reasons and interests in the research topic</i><br><b>There were no biases or conflicts of interest to disclose. Participants were told the reason for conducting the research was to understand patient perspectives on remote consultations and see how the process could be improved.</b> |
| <b>Domain 2: study design</b> |                                          |                                                                                                                                                                                                                                                                                                                                                                                               |
| Theoretical framework         |                                          |                                                                                                                                                                                                                                                                                                                                                                                               |
| 9.                            | Methodological orientation and Theory    | What methodological orientation was stated to underpin the study? <i>e.g. grounded theory, discourse analysis, ethnography, phenomenology, content analysis</i><br><b>Thematic analysis approach as well as a deductive approach.</b><br><b>(Page 2)</b>                                                                                                                                      |
| Participant selection         |                                          |                                                                                                                                                                                                                                                                                                                                                                                               |

| No      | Item                         | Guide questions/description                                                                                                                                                                                                                    |
|---------|------------------------------|------------------------------------------------------------------------------------------------------------------------------------------------------------------------------------------------------------------------------------------------|
| 10.     | Sampling                     | How were participants selected? <i>e.g. purposive, convenience, consecutive, snowball</i><br><b>Surgeons asked patients permission to share information with the student researcher. Recruitment by student researcher.</b><br><b>(Page 2)</b> |
| 11.     | Method of approach           | How were participants approached? <i>e.g. face-to-face, telephone, mail, email</i><br><b>Telephone</b><br><b>(Page 2)</b>                                                                                                                      |
| 12.     | Sample size                  | How many participants were in the study?<br><b>45</b><br><b>(Page 3)</b>                                                                                                                                                                       |
| 13.     | Non-participation            | How many people refused to participate or dropped out? Reasons?<br><b>15 patients elected not to participate in an interview. Reasons were not given.</b><br><b>(Page 3)</b>                                                                   |
| Setting |                              |                                                                                                                                                                                                                                                |
| 14.     | Setting of data collection   | Where was the data collected? <i>e.g. home, clinic, workplace</i><br><b>Via telephone in a private office</b><br><b>(Page 2)</b>                                                                                                               |
| 15.     | Presence of non-participants | Was anyone else present besides the participants and researchers?<br><b>In some cases family members of participants were present</b>                                                                                                          |

| No              | Item                   | Guide questions/description                                                                                                                                                                          |
|-----------------|------------------------|------------------------------------------------------------------------------------------------------------------------------------------------------------------------------------------------------|
| 16.             | Description of sample  | What are the important characteristics of the sample? <i>e.g. demographic data, date</i><br><b>We collected age, gender, and distance from Saskatoon. (Page 3)</b>                                   |
| Data collection |                        |                                                                                                                                                                                                      |
| 17.             | Interview guide        | Were questions, prompts, guides provided by the authors? Was it pilot tested?<br><b>Questions were provided by the researchers in the form of a brief, semi-structured interview guide. (Page 2)</b> |
| 18.             | Repeat interviews      | Were repeat interviews carried out? If yes, how many?<br><b>No repeat interviews were done</b>                                                                                                       |
| 19.             | Audio/visual recording | Did the research use audio or visual recording to collect the data?<br><b>The interviews were audio-recorded (Page 2)</b>                                                                            |
| 20.             | Field notes            | Were field notes made during and/or after the interview or focus group?<br><b>No field notes were made.</b>                                                                                          |
| 21.             | Duration               | What was the duration of the interviews or focus group?<br><b>2-8 minutes (Page 2)</b>                                                                                                               |
| 22.             | Data saturation        | Was data saturation discussed?<br><b>Yes. We reviewed transcriptions as we went. Interviews were stopped</b>                                                                                         |

| No                                                | Item                           | Guide questions/description                                                                                                                                                                                 |
|---------------------------------------------------|--------------------------------|-------------------------------------------------------------------------------------------------------------------------------------------------------------------------------------------------------------|
|                                                   |                                | <p>when no new themes were being identified. We did a retrospective analysis to ensure we had reached data saturation.<br/>(Page 2)</p>                                                                     |
| 23.                                               | Transcripts returned           | <p>Were transcripts returned to participants for comment and/or correction?<br/><b>Participants did not have the opportunity to review transcripts</b></p>                                                  |
| <p><b>Domain 3:<br/>analysis and findings</b></p> |                                |                                                                                                                                                                                                             |
| <p>Data analysis</p>                              |                                |                                                                                                                                                                                                             |
| 24.                                               | Number of data coders          | <p>How many data coders coded the data?<br/><b>2 researchers coded the data independently. 2 patient partners also contributed to determining themes and subthemes.</b><br/>(Page 3)</p>                    |
| 25.                                               | Description of the coding tree | <p>Did authors provide a description of the coding tree?<br/><b>Yes</b><br/>(Page 5)</p>                                                                                                                    |
| 26.                                               | Derivation of themes           | <p>Were themes identified in advance or derived from the data?<br/><b>Derived from the data. However, the two main categories, advantages and disadvantages, were derived deductively.</b><br/>(Page 2)</p> |

| No        | Item                         | Guide questions/description                                                                                                                                                                              |
|-----------|------------------------------|----------------------------------------------------------------------------------------------------------------------------------------------------------------------------------------------------------|
| 27.       | Software                     | What software, if applicable, was used to manage the data?<br><b>Nvivo</b><br><b>(Page 3)</b>                                                                                                            |
| 28.       | Participant checking         | Did participants provide feedback on the findings?<br><b>Patient partners helped with analysis, interpretation and writing the manuscript.</b><br><b>(Page 3)</b>                                        |
| Reporting |                              |                                                                                                                                                                                                          |
| 29.       | Quotations presented         | Were participant quotations presented to illustrate the themes / findings? Was each quotation identified? <i>e.g. participant number</i><br><b>Quotations were presented and identified. (Pages 5-8)</b> |
| 30.       | Data and findings consistent | Was there consistency between the data presented and the findings?<br><b>There was consistency between the data reported and the findings.</b><br><b>(Pages 5-8)</b>                                     |
| 31.       | Clarity of major themes      | Were major themes clearly presented in the findings?<br><b>Major themes were all presented in the findings</b><br><b>(Pages 5-8)</b>                                                                     |
| 32.       | Clarity of minor themes      | Is there a description of diverse cases or discussion of minor themes?<br><b>Subthemes were discussed in the interpretation</b><br><b>(Pages 8-11)</b>                                                   |
